# Supplementary material
Source: PubMed Central journal article supplement (PMC4004322)
Supplement: nn500810n_si_001.pdf [file nn500810n_si_001.pdf]

# Supporting Information

## Synthesis of Fluorosurfactants for Emulsion-Based Biological Applications

*Ya-Ling Chiu<sup>1,†</sup>, Hon Fai Chan<sup>1</sup>, Kyle K. L. Phua<sup>1,2</sup>, Ying Zhang<sup>1</sup>, Sissel Juul<sup>1</sup>, Birgitta R. Knudsen<sup>3,4</sup>, Yi-Ping Ho<sup>4,\*</sup>, and Kam W. Leong<sup>1,\*</sup>*

<sup>1</sup>Department of Biomedical Engineering, Duke University, North Carolina 27708, USA

<sup>2</sup>Department of Chemical & Biomolecular Engineering, National University of Singapore,  
Singapore 117576, Singapore

<sup>3</sup>Department of Molecular Biology and Genetics, Aarhus University, Aarhus 8000, Denmark

<sup>4</sup>Interdisciplinary Nanoscience Center (iNANO), Aarhus University, Aarhus 8000, Denmark

<sup>†</sup> Present Address: Department of Chemical Engineering, National Tsing Hua University,  
Hsinchu, 30013, Taiwan

\*Address correspondence to [megan.ypho@inano.au.dk](mailto:megan.ypho@inano.au.dk) and [kam.leong@duke.edu](mailto:kam.leong@duke.edu)

## Supplementary Figures

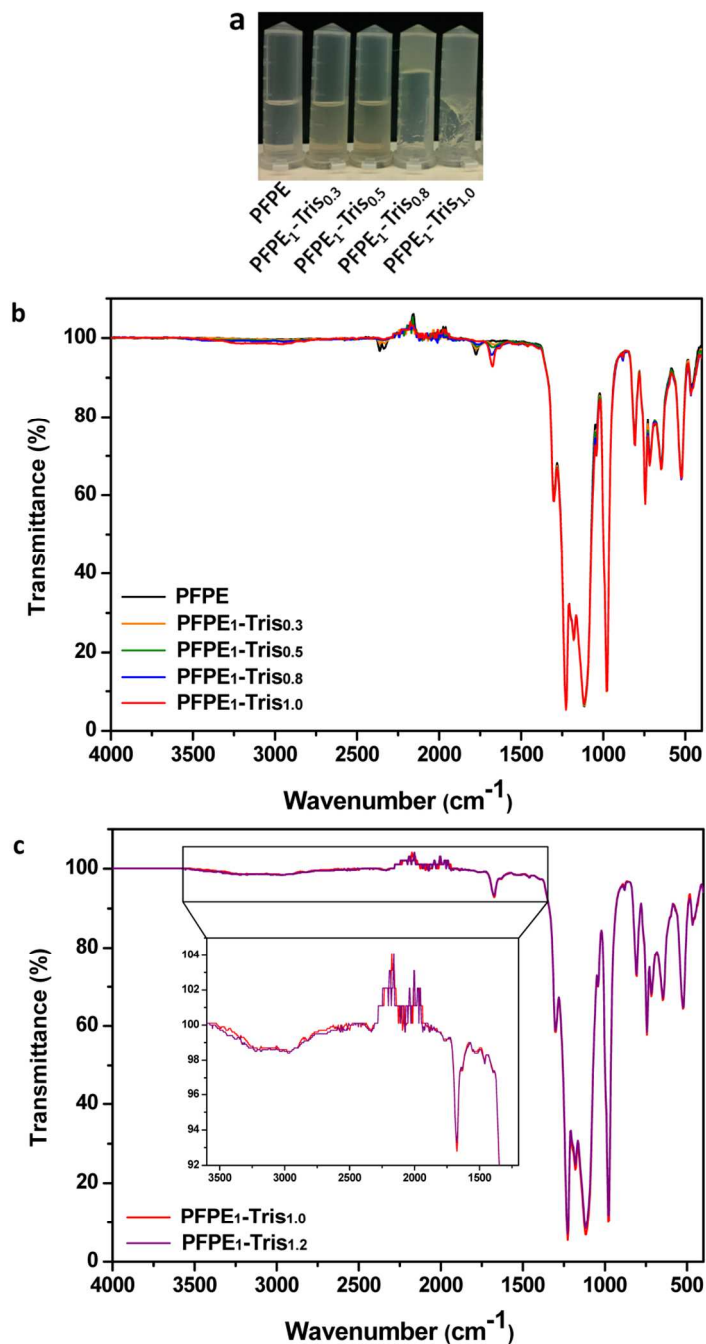

**Figure S1.** (a) Photograph of the synthesized PFPE-Tris surfactants with increasing the feed molar ratio of Tris to PFPE from 0.3, 0.5, 0.8 to 1.0 and (b) their full-scale FT-IR spectra. (c) Comparison of FT-IR spectra of the synthesized PFPE-Tris surfactants at Tris/PFPE feed molar ratios of 1.0 (PFPE<sub>1</sub>-Tris<sub>1.0</sub>) and 1.2 (PFPE<sub>1</sub>-Tris<sub>1.2</sub>) showed no major difference, indicating a complete conversion of PFPE-Tris occurred at the feed molar ratio of 1.0.

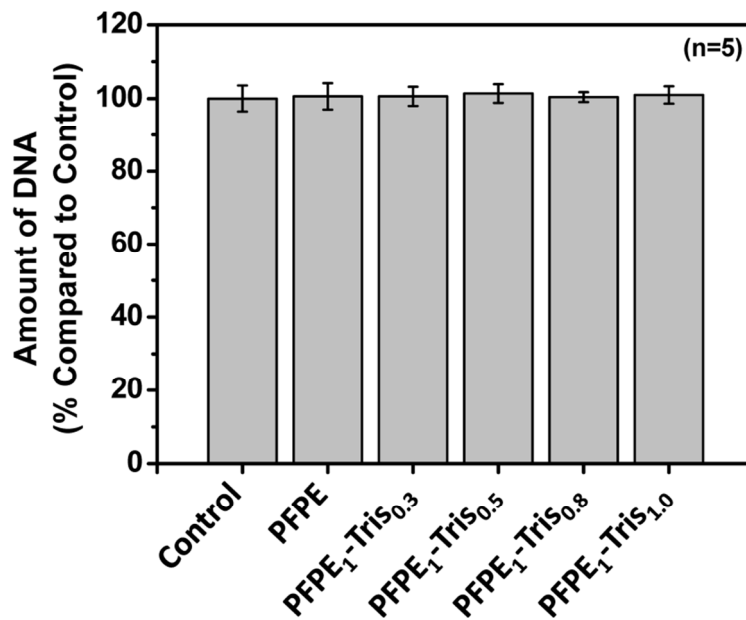

**Figure S2.** Amount of DNA recovered from w/o emulsion after disrupting the droplets by a droplet breaking agent.

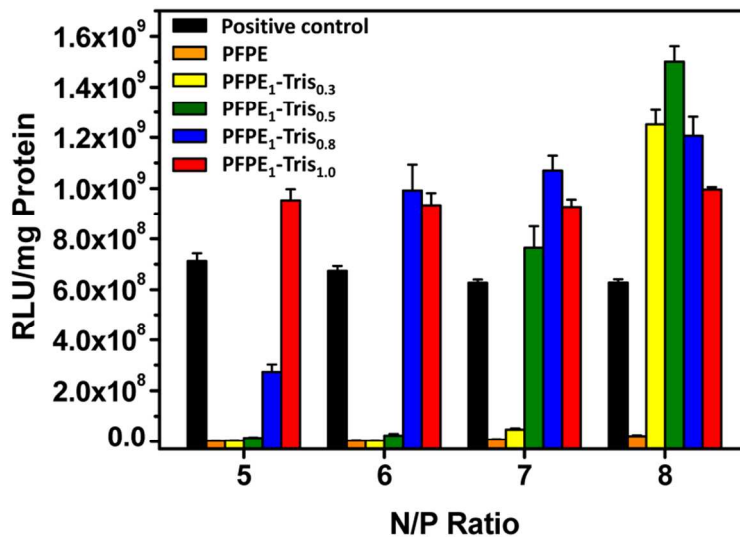

**Figure S3.** Luciferase activities of the transfected cells. Cells were transfected *in vitro* using jetPEI<sup>TM</sup>/DNA complexes synthesized in w/o emulsion droplets stabilized with different test surfactants. The jetPEI<sup>TM</sup>/DNA polyplexes formulated without emulsion treatment was used as a positive control.

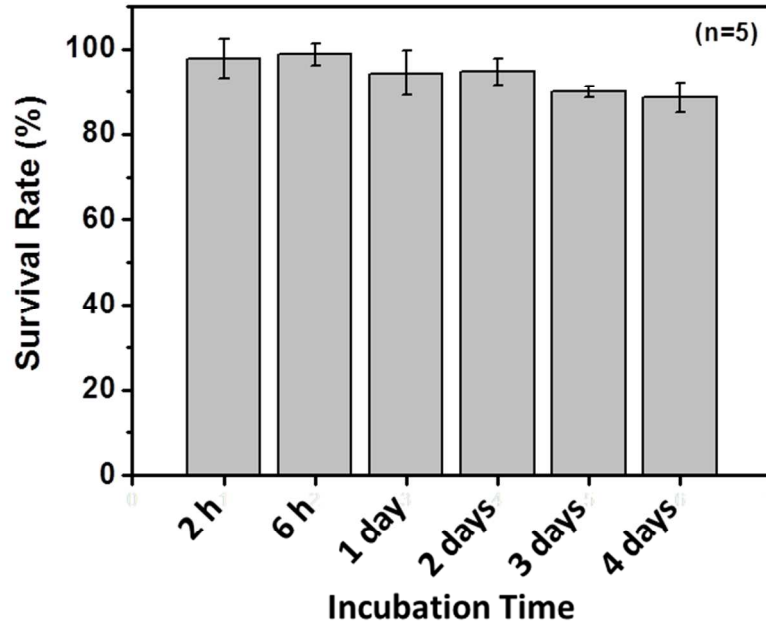

**Figure S4.** Survival rate of hMSCs cultured in the emulsion droplets. hMSCs maintained their viability (>85%) in the w/o/w droplets for at least 4 days.
